# Supplementary figures and images for: Association of antiviral prophylaxis and rituximab use with posttransplant lymphoproliferative disorders (PTLDs): A nationwide cohort study
Source: PubMed Central journal article supplement — Am J Transplant. 2020 Dec 22;21(7):2532–42. doi: 10.1111/ajt.16423 (PMC8359347; doi:10.1111/ajt.16423), 2020-12-22

**FIGURE A**

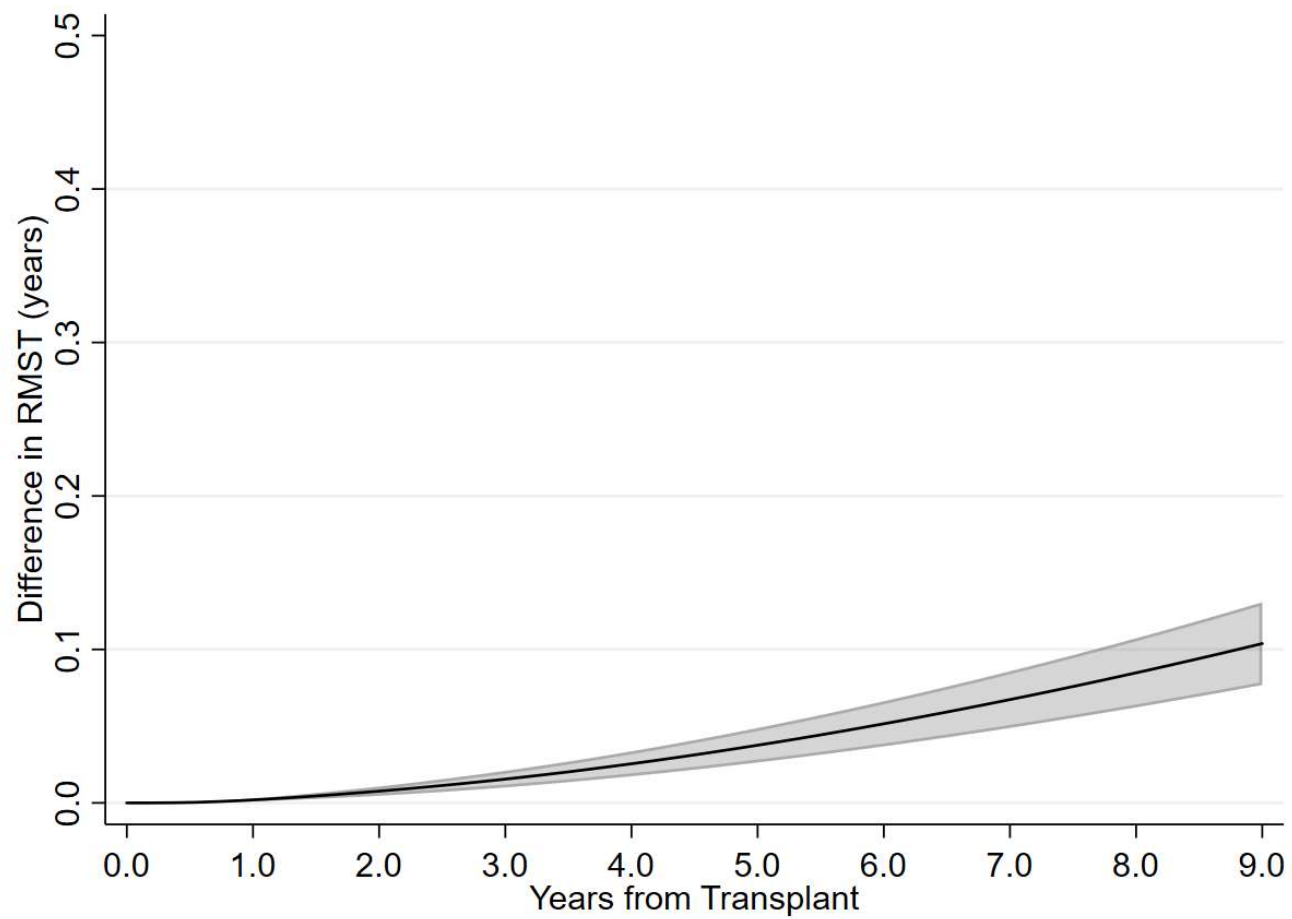

Supplement: AJT-21-2532-s001.pdf [file AJT-21-2532-s001.pdf]
